# Supplementary material
Source: PubMed Central journal article supplement (PMC2877147)
Supplement: NIHMS179536-supplement-1_si_001.pdf [file NIHMS179536-supplement-1_si_001.pdf]

Supplementary materials

Enhanced Tumor Cell Isolation by a Biomimetic Combination of E-selectin and anti-EpCAM: Implication for Effective Separation of Circulating Tumor Cells (CTCs)

*Ja Hye Myung<sup>1</sup>, Cari A. Launier<sup>2</sup>, David T. Eddington<sup>2</sup>, and Seungpyo Hong<sup>\*1,2</sup>*

*Departments of <sup>1</sup>Biopharmaceutical Sciences and <sup>2</sup>Bioengineering, University of Illinois, Chicago, IL 60612*

\*All correspondence should be addressed to:

Prof. Seungpyo Hong, Ph.D.

Department of Biopharmaceutical Sciences

College of Pharmacy

The University of Illinois at Chicago

833 S. Wood St. Rm 335

Chicago, IL 60612

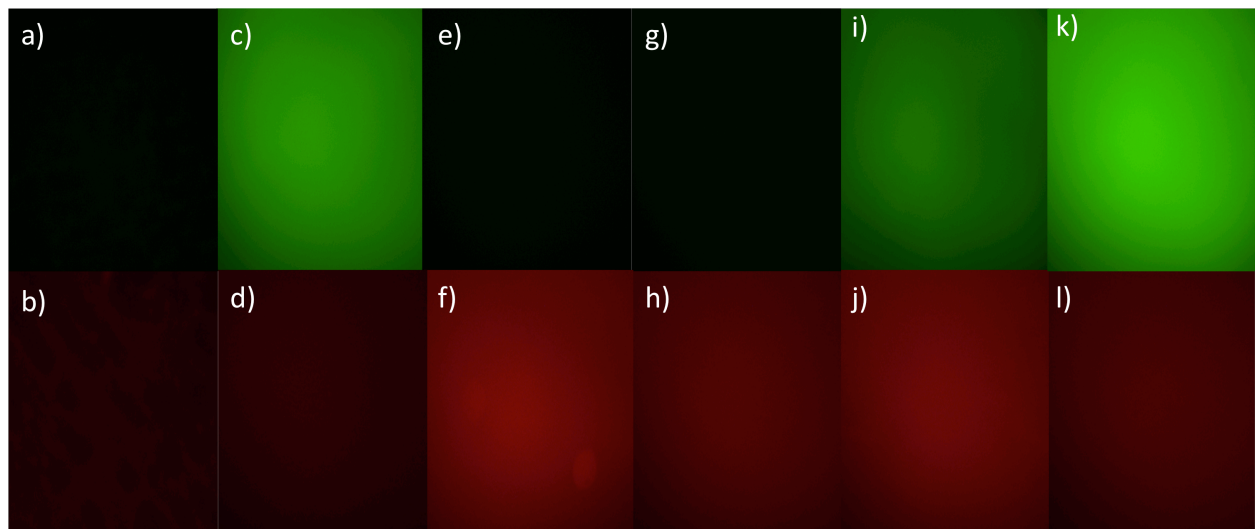

**Supplementary Figure 1.** Fluorescence images of functionalized surfaces treated with a) and b) BSA; c) and d) E-selectin; e) and f) anti-EpCAM; and g) - l) E-selectin/EpCAM mixtures at various ratios that are given in Table 1. Note that green and red fluorescence come from fluorescein-anti-E-selectin and APC-anti-EpCAM, respectively.
